# Supplementary material for: PSMD12-Mediated M1 Ubiquitination of Influenza A Virus at K102 Regulates Viral Replication
Source: PubMed Central journal article supplement (PMC9364790; doi:10.1128/jvi.00786-22), 2022-07-21
Supplement: jvi.00786-22-s0001.pdf [file jvi.00786-22-s0001.pdf]

28 **Supplementary Table**29 **Table S1.** Candidate Host proteins for Further Analysis

| <b>Gene ID</b> | <b>Gene abbreviation</b> | <b>protein name</b>                                                                    | <b>NCBI accession number</b> |
|----------------|--------------------------|----------------------------------------------------------------------------------------|------------------------------|
| 429558         | HIST1H2B5L               | histone cluster 1, H2B-V-like<br>(similar to human histone cluster 1, class H2B genes) | XM_004934773                 |
| 395853         | HSPA8                    | heat shock 70kDa protein 8                                                             | NM_205003                    |
| 420039         | KRTC42L                  | keratin, type I cytoskeletal 42-like                                                   | -                            |
| 427882         | HISTH1                   | histone H1                                                                             | NM_001396439                 |
| 395855         | CALM2                    | calmodulin 2                                                                           | NM_205005                    |
| 423504         | HSP70                    | heat shock 70kDa protein 2                                                             | NM_001006685                 |
| 374193         | GAPDH                    | glyceraldehyde-3-phosphate dehydrogenase                                               | NM_204305                    |
| 424115         | DNAJC10                  | DnaJ heat shock protein family (Hsp40) member C10                                      | XM_046943855                 |
| 419963         | MYO1D                    | myosin ID                                                                              | XM_040653400                 |
| <b>417425</b>  | <b>PSMD12</b>            | <b>proteasome 26S subunit, non-ATPase 12</b>                                           | <b>NM_001316341</b>          |
| 418016         | RPL3                     | ribosomal protein L3                                                                   | NM_001006241                 |
| 420001         | RPL23                    | ribosomal protein L23                                                                  | NM_001321599                 |
| 418710         | RPL31                    | ribosomal protein L31                                                                  | NM_001277755                 |
| 416275         | RPS14                    | ribosomal protein S14                                                                  | XM_015293785                 |
| 770103         | TPM3                     | tropomyosin 3                                                                          | NM_001245927                 |
| 100859627      | HNRNPA3                  | heterogeneous nuclear ribonucleoprotein A3                                             | XM_025152378                 |
| -              | A0A1D5PQ92               | Uncharacterized protein                                                                | -                            |
| -              | A0A1D5PK18               | Uncharacterized protein                                                                | -                            |
| -              | TBA1                     | Tubulin alpha-1 chain                                                                  | -                            |

30

31

32 **Table S2. siRNA target PSMD12 in this study.**

| Name       | Sense sense (5'-3')                                 | antisense (5'-3')                       |
|------------|-----------------------------------------------------|-----------------------------------------|
| siPSMD12-1 | GCGUAUCUUAGUGGCU<br>AUATT                           | UAUAGCCACUAAGAUACG<br>CTT               |
| siPSMD12-2 | <b>GCAGAUGAGGCUCUGU</b><br><b>CUATT</b>             | <b>UAGACAGAGCCUCAUCU</b><br><b>GCTT</b> |
| siPSMD12-3 | CCACACAUCUCAUUGCC<br>AATT                           | UUGGCAAUGAGAUGUGU<br>GGTT               |
| shRNA-1    | Target sequence (DNA): GGTTACCGAAGGCAAGATTTA        |                                         |
| shRNA-2    | Target sequence (DNA): GCACAGCTTCTGGATCTATCT        |                                         |
| shRNA-3    | Target sequence (DNA): <b>GCACTACAGAGCAATATATGA</b> |                                         |

33

34 **Table S3. The main primers used in this study.**

| Name             | Sequence (5'-3')             |
|------------------|------------------------------|
| K21R-F           | CATCCCATCAGGCCCCCTCAGAGCCGAG |
| K21R-R           | GTTTCTGCGCGATCTCGGCTCTGAGGGG |
| K35R-F           | GATGTGTTTGCAGGAAGAAACGCTG    |
| K35R-R           | CCTCGAGATCAGCGTTTCTTCCTG     |
| K98R-F           | GGGCAGTTAGGCTATATAAGAAGCTG   |
| K98R-R           | CTTATATAGCCTAACTGCCCTATCC    |
| K101R-F          | GTTAAGCTATATAGGAAGCTGAAAAG   |
| K101R-R          | CTCTTTTCAGCTTCTATATAGC       |
| K102R-F          | GCTATATAAGAGGCTGAAAAGAG      |
| K102R-R          | CTCTTTTCAGCTCTTATATAGC       |
| K113R-F          | GGAGCTAGGGAGGTCGCACTCAGTTAC  |
| K113R-R          | GTGCGACCTCCCTAGCTCCATGG      |
| K187R-F          | CTACAGCTAGGGCTATGGAGCAGATGG  |
| K187R-R          | CCATAGCCCTAGCTGTAGTGCTGGC    |
| K242R-F          | CCTACCAGAGACGAATGGGAGTGCGAG  |
| K242R-R          | CCCATTTCGTCTCTGGTAGGCCTGC    |
| K252R-F          | GATGCAGCGATTCAAGGTGAGGATC    |
| K252R-R          | GCCCGGGATCCTCACCTGAATCGC     |
| qRT-PCR-IAV-M1-F | CTTCTAACCGAGGTCGAAACG        |
| qRT-PCR-IAV-M1-R | GGCATTTTGGACAAAKCGTCTA       |
| Uni12 primer     | AGCAAAAGCAGG                 |

35

36 Supplementary Figures and Figure legends

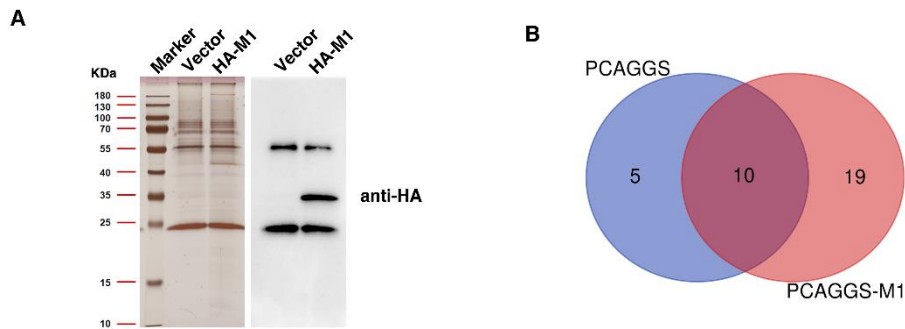

37

38 **Supplementary Figure 1. Identification of influenza virus M1-associated factors**  
39 **by immunoprecipitation-mass spectrometry (IP/MS).** (A) The  
40 coimmunoprecipitated proteins were separated and visualised by silver staining (left)  
41 and western blotting (right). (B) Venn diagram.

42

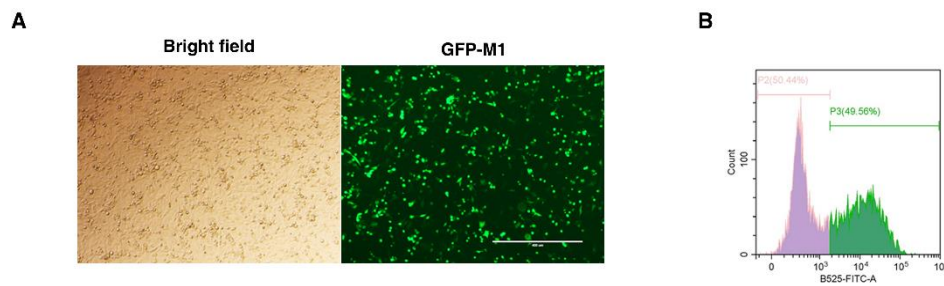

43

44 **Supplementary Figure 2. Transfection efficiency of Lip2000 reagent on DF1 cells.**  
45 (A) Fluorescence observation 24 hours after transfection of pEGFP-M1 plasmid into  
46 DF1 cells using Lip2000 reagent. (B) The transfection efficiency was determined by  
47 flow cytometry analysis.

48

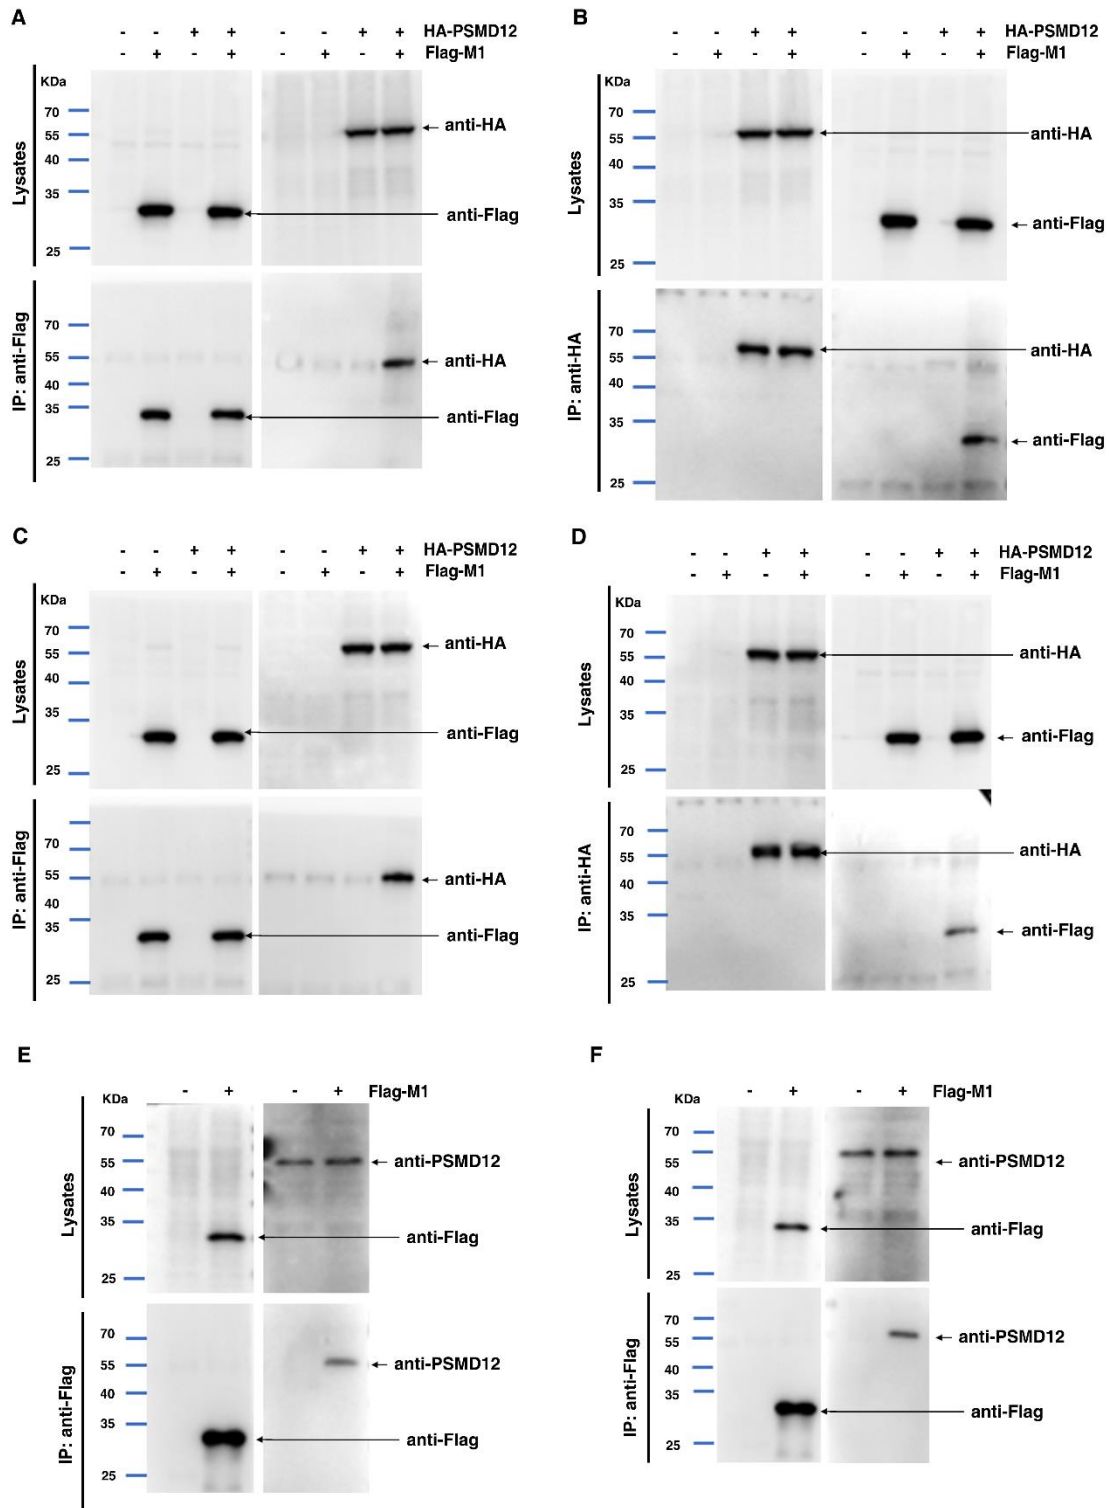

49

50 **Supplementary Figure 3. Full western blot figure reference to Figure 3.** (A,  
 51 reference to Figure 3A) DF1 cells were transfected with plasmids encoding HA-  
 52 PSMD12 and Flag-M1. The lysates were subjected to anti-Flag IP and analysed via  
 53 western blotting (WB). (B, reference to Figure 3B) DF1 cells were transfected with  
 54 plasmids encoding HA-PSMD12 and Flag-M1. The lysates were subjected to anti-HA  
 55 IP and analysed via WB. (C, reference to Figure 3F) HEK293T cells were transfected  
 56 with plasmids encoding HA-PSMD12 (human source) and Flag-M1. The lysates were

57 subjected to anti-Flag IP and analysed via WB. (D, reference to Figure 3G) HEK293T  
 58 cells were transfected with plasmids encoding HA-PSMD12 and Flag-M1. The  
 59 lysates were subjected to anti-HA IP and analysed via WB. (E, reference to Figure 3C)  
 60 DF1 cells were transfected with a plasmid encoding Flag-M1, and the lysate was  
 61 subjected to IP and analysed for endogenous PSMD12 via WB. (F, reference to  
 62 Figure 3H) HEK293T cells were transfected with a plasmid encoding Flag-M1, and  
 63 the lysate was subjected to IP and analysed for endogenous PSMD12 via WB.  
 64

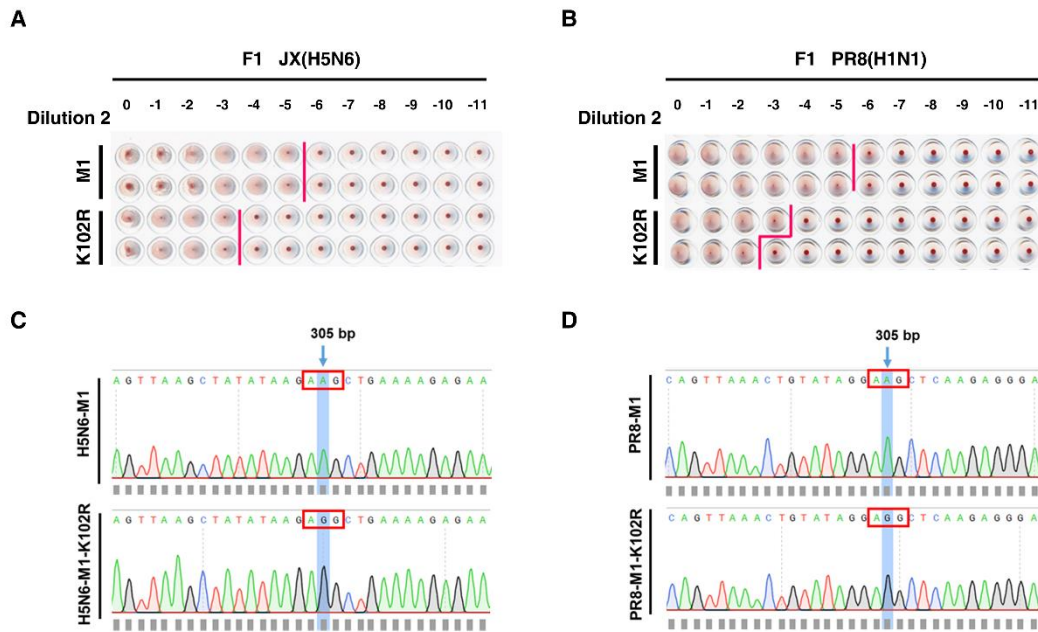

65

66 **Supplementary Figure 4. H5N6 and PR8 M1-K102R mutant viruses obtained by**

67 **infectious cloning.** (A) Hemagglutination test was performed on the allantoic fluid of

68 chicken embryos infected with the first-generation H5N6 virus plasmid recombinant

69 virus. (B) Hemagglutination test was performed on the allantoic fluid of chicken

70 embryos infected with the first-generation PR8 virus plasmid recombinant virus. (C)

71 H5N6 and its mutants viral RNA sequence was sequenced by Sanger method. (D) PR8

72 and its mutants viral RNA sequence was sequenced by Sanger method.

73

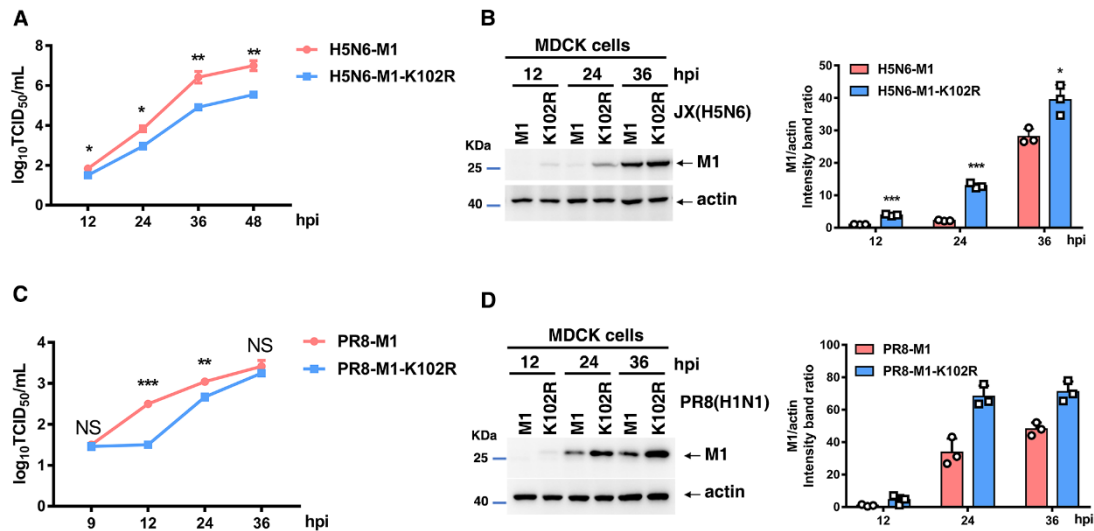

74

75 **Supplementary Figure 5. Mutation at the M1 K102 site alters viral replication in**  
 76 **cells.** (A, B) MDCK cells were infected with H5N6-M1 or H5N6-M1-K102R virus,  
 77 the supernatant was collected at different time points for TCID<sub>50</sub> measurement, and  
 78 the cell lysates were analysed by western blotting (WB). (C, D) MDCK cells were  
 79 infected with PR8-M1 or PR8-M1-K102R virus, the supernatant was collected at  
 80 different time points for TCID<sub>50</sub> measurement, and the cell lysates were analysed by  
 81 WB. Error bars, mean ± SD of three experiments. All by two-tailed Student's t test; \*p  
 82 < 0.05; \*\*p < 0.01; \*\*\*p < 0.001.

83

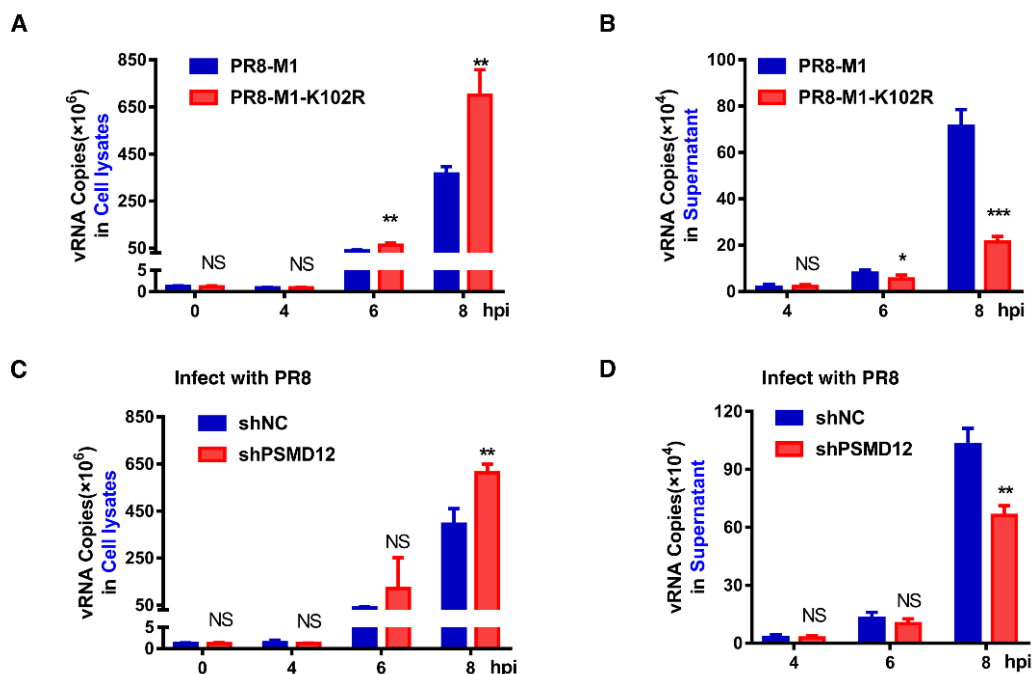

84

85 **Supplementary Figure 6. M1 K102 mutation or knockdown PSMD12 restricts**  
 86 **virus release.** (A, B) A549 cells were infected with PR8-M1 or PR8-M1-K102R virus  
 87 (MOI of 5), the cell lysates (A) and supernatant (B) were collected at different time

88 points and analysed vRNA of M1 by qRT-PCR. (C, D) A549 cells were infected with  
 89 PR8-M1 virus at MOI=5. The cell lysates (C) and supernatant (D) were collected at  
 90 different time points and analysed vRNA of M1 by qRT-PCR. All by two-tailed  
 91 Student's t test; \* $p < 0.05$ ; \*\* $p < 0.01$ ; \*\*\* $p < 0.001$ .  
 92

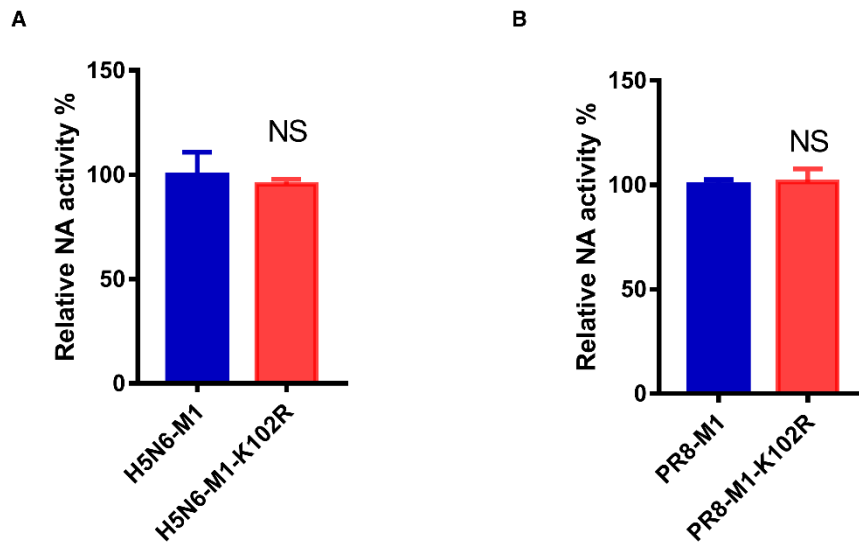

93  
 94 **Supplementary Figure 7.** Detection of NA activity of influenza virus. (A, B) The NA  
 95 activity of H5N6 (A) and PR8 (B) viruses was determined as described in materials  
 96 and methods (NA activity assay). The results are displayed as mean  $\pm$  SD of three  
 97 independent experiments. The comparisons were performed with t tests.  
 98

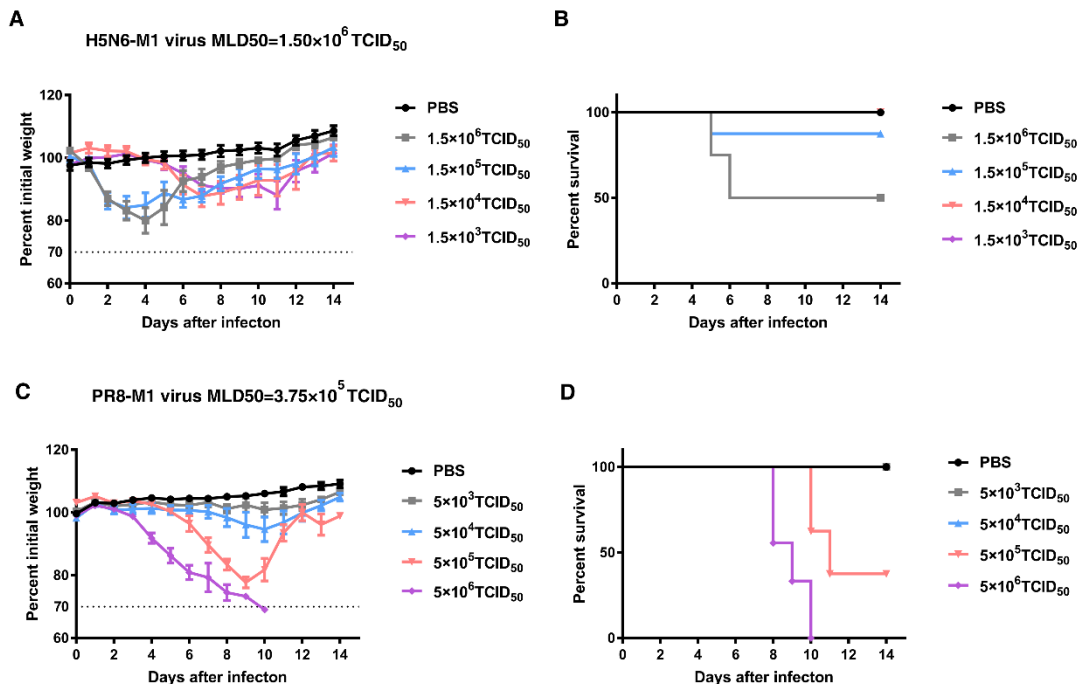

99  
 100 **Supplementary Figure 8.** MLD50 dose of PR8 and H5N6 influenza viruses. (A, B)



101 Six-week-old C57/BL6 mice were intranasally infected with 10-fold serially diluted -  
102 H5N6-M1 virus. Body weight (A) and survival (B) were monitored daily for two  
103 weeks (n=8). (C, D) Six-week-old C57/BL6 mice were intranasally infected with 10-  
104 fold serially diluted PR8-M1 virus. Body weight (C) and survival (D) were monitored  
105 daily for two weeks (n=8).  
106

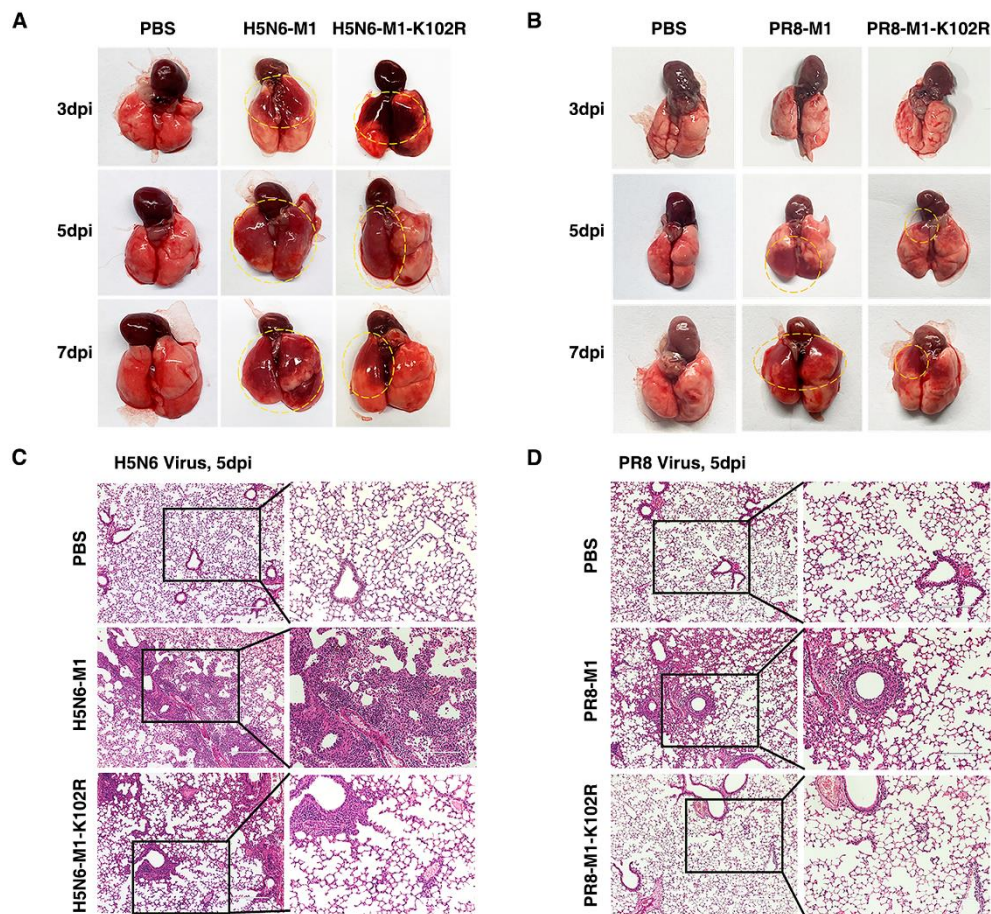

107  
108 **Supplementary Figure 9. Gross pathology and histopathology.** Six-week-old  
109 C57/BL6 mice were intranasally infected with WT and M1-K102R mutant H5N6 or  
110 PR8 viruses at a dose of 2×MLD<sub>50</sub>. (A, B) Macroscopic appearance of lung tissue of  
111 C57/BL6 mice at 3, 5, and 7 dpi with H5N6 (A) or PR8 (B) virus. Post-mortem  
112 findings revealed focal dark red lesions (circled). (C, D) Lung tissues of C57/BL6  
113 mice challenged with H5N6-M1 or H5N6-M1-K102R virus (C) and PR8-M1 or PR8-  
114 M1-K102R virus (D) at 5 dpi. H&E staining shows inflammatory cell infiltration and  
115 moderate interstitial pneumonia with thickened alveolar septa.

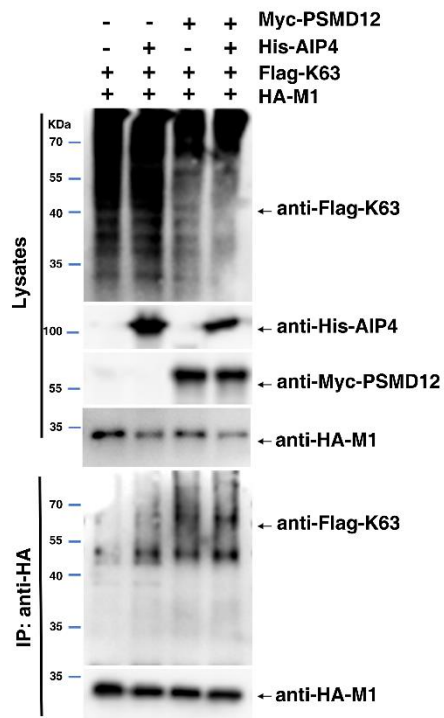

**Supplementary Figure 10. AIP4 could not synergistically promote K63-linked ubiquitination of M1 with PSMD12.**

HEK293T cells were transfected with the indicated plasmid combinations to measure ubiquitination of M1.
